# Supplementary material for: Hierarchically porous-structured ZnxCo1−xS@C–CNT nanocomposites with high-rate cycling performance for lithium-ion batteries
Source: Royal Society of Chemistry journal article supplement (doi:10.1039/c7ta07993a), 2017-01-01
Supplement: c7ta07993a1.pdf [file c7ta07993a1.pdf]

## Supporting Information for

### **Hierarchically Porous-Structured $Zn_xCo_{1-x}S@C$ - CNTs Nanocomposites with High-Rate Cycling Performance for Lithium-Ion Batteries**

*Hao Wang,<sup>&, †</sup> Ziliang Chen,<sup>&, †</sup> Yang Liu,<sup>†</sup> Hongbin Xu,<sup>†</sup> Licheng Cao,<sup>†</sup> Huilin Qing,<sup>†</sup>  
and Renbing Wu,<sup>\*, †</sup>*

<sup>†</sup>Department of Materials Science, Fudan University, Shanghai 200433, P. R. China

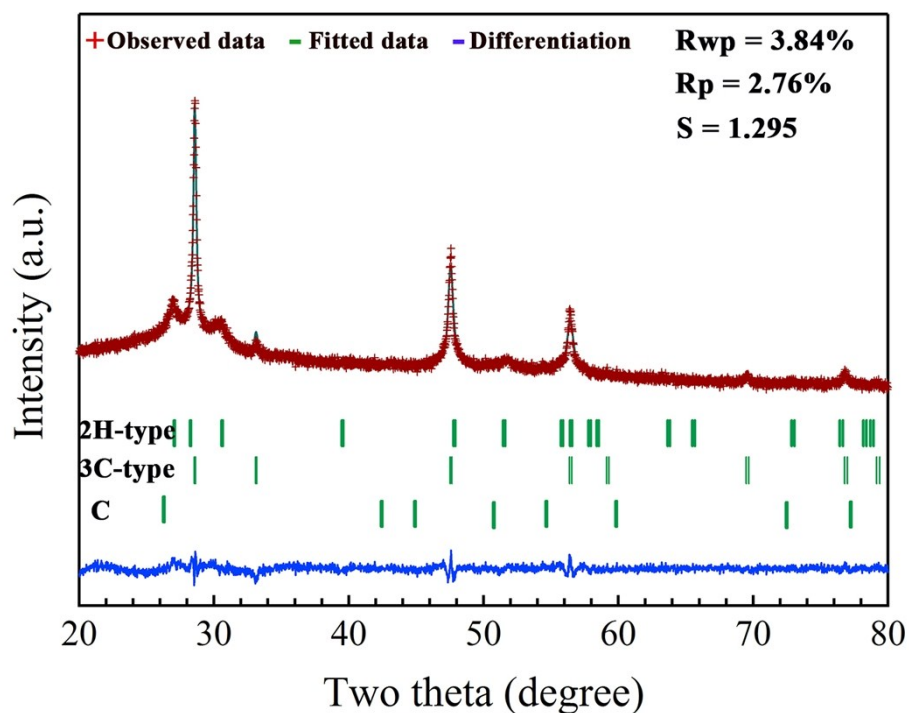

**Fig. S1** Rietveld refinement image for the XRD pattern of  $Zn_xCo_{1-x}S@C-CNTs$

**Table S1.** Rietveld refinement result for the XRD pattern of  $Zn_xCo_{1-x}S@C-CNTs$

| Sample                 | Phase   | Space group               | Lattice parameters (Å) |           | Amount (wt.%) |
|------------------------|---------|---------------------------|------------------------|-----------|---------------|
|                        |         |                           | <i>a</i>               | <i>c</i>  |               |
| $Zn_xCo_{1-x}S@C-CNTs$ | 3C-type | <i>F-43m</i>              | 5.3946(5)              | –         | 71            |
|                        | 2H-type | <i>P6<sub>3</sub>mc</i>   | 3.8025(3)              | 6.1863(5) | 22            |
|                        | C       | <i>P6<sub>3</sub>/mmc</i> | 2.48(3)                | 6.73(2)   | 7             |

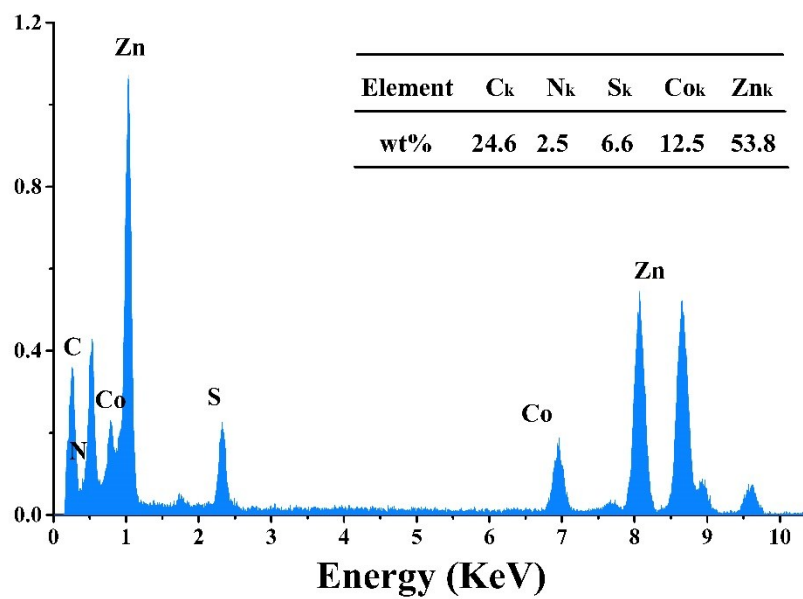

**Fig. S2** Energy Dispersive Spectrometer (EDS) spectrum of Zn<sub>x</sub>Co<sub>1-x</sub>S@C-CNT.

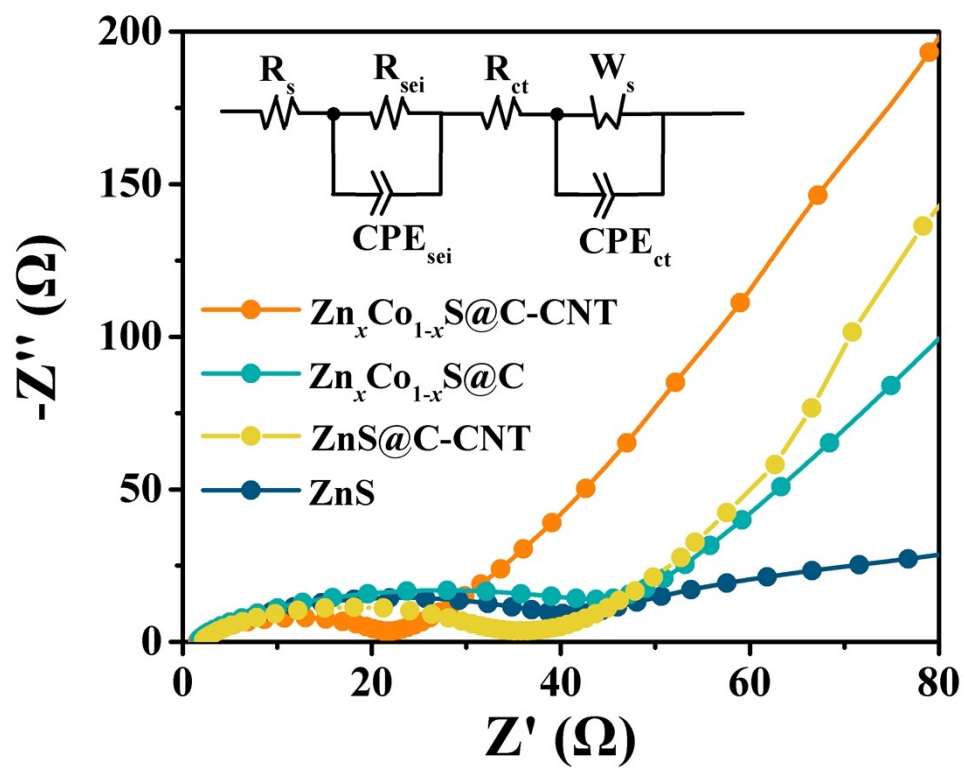

**Fig. S3** Electrochemical Impedance Spectroscopy of  $Zn_xCo_{1-x}S@C-CNTs$  and commercial  $ZnS$  as anodes for LIBs.

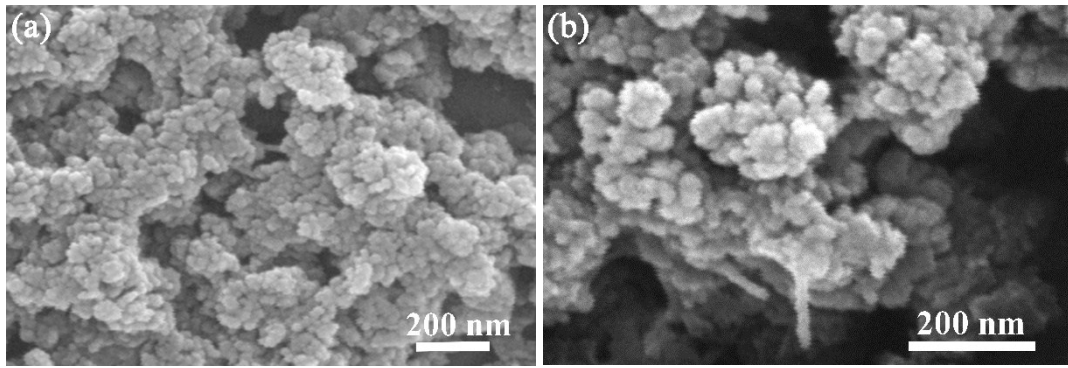

**Fig. S4** (a-b) TEM images of  $\text{Zn}_x\text{Co}_{1-x}\text{S}@C\text{-CNTs}$  anodes after cycling for over 1000 times at a current density of  $1.2 \text{ A g}^{-1}$ .

**Table S2** Comparison of electrochemical performances of  $Zn_xCo_{1-x}S@C$ -CNTs anode with previously reported zinc chalcogenides-based electrodes.

| Products                      | Synthetic method                      | Electrode formulation <sup>a</sup> | Cycling stability (A/B/n) <sup>b</sup> | Ref.     |
|-------------------------------|---------------------------------------|------------------------------------|----------------------------------------|----------|
| Yolk-shell-structured Zn-Fe-S | spray pyrolysis                       | 70:20:10(CMC) <sup>c</sup>         | 913/0.5/50                             | [S1]     |
| ZnS-RGO                       | spray pyrolysis                       | 70:20:10(CMC)                      | 628/1/300                              | [S2]     |
| ZnS/RGO                       | hydrothermal                          | 80:10:10                           | 790/0.49/300                           | [S3]     |
| ZnS@C                         | Precipitation Method                  | 75:15:10                           | 304.4/0.4/300                          | [S4]     |
| ZnS@porous carbon             | MOF-derived                           | Bind-free                          | 438/0.1/300                            | [S5]     |
| ZnS/graphene                  | Solvothermal                          | Bind-free                          | 570/0.2/200                            | [S6]     |
| Core-shell structured ZnS-C   | Chitosan-assisted hydrothermal        | 70:15:15(CMC)                      | 530/0.1/600                            | [S7]     |
| Spherical ZnS/C               | Spray pyrolysis                       | 70:15:15(CMC)                      | 868/1/300                              | [S8]     |
| ZnS/C                         | Solvothermal                          | 70:15:15(CMC)                      | 741/0.1/300                            | [S9]     |
| ZnS@NC                        | Hydrothermal                          | 70:15:15 (SA) <sup>d</sup>         | 690/0.1/100                            | [S10]    |
| Co-Zn-S@NS-C-CNT              | Bimetal-organic-frameworks derivation | 80:10:10                           | 941/0.1/250                            | [S11]    |
| $Zn_xCo_{1-x}S$               | Oil phase approach                    | 80:10:10                           | 750/0.2/100                            | [S12]    |
| $Zn_xCo_{1-x}S@C$ -CNTs       | Precipitation Method                  | 70:20:10                           | 635/1.2/1000                           | Our work |

<sup>a</sup>Weight ratio of the active material, carbon and binder. PVDF was used as binder if not mentioned. Other values used were specified.

<sup>b</sup>A/B/n means the capacity of A (mAh g<sup>-1</sup>) remained after n cycles at the certain current density of B (A g<sup>-1</sup>).

<sup>c</sup>CMC means carboxymethyl cellulose.

<sup>d</sup>SA means sodium alginate.

## Reference

- S1. J. M. Won, J. Lee and Y. C. Kang, *Chem. Eur. J.*, 2015, **21**, 1429-1433.
- S2. G. D. Park, S. H. Choi, J. Lee and Y. C. Kang, *Chem. Eur. J.*, 2014, **20**, 12183-12189.
- S3. Y. Feng, Y. Zhang, Y. Wei, X. Song, Y. Fub and V. S. Battaglia, *Phys. Chem. Chem. Phys.*, 2016, **18**, 30630-30642.
- S4. L. He, X. Liao, K. Yang, Y. He, W. Wen and Z. Ma, *Electrochim. Acta*, 2011, **56**, 1213-1218.
- S5. Y. Fu, Z. Zhang, X. Yang, Y. Gan and W. Chen, *RSC Adv.*, 2015, **5**, 86941-86944.
- S6. M. Mao, L. Jiang, L. Wu, M. Zhang and T. Wang, *J. Mater. Chem. A*, 2015, **3**, 13384-13389.
- S7. X. Du, H. Zhao, Z. Zhang, Y. Lu, C. Gao, Z. Li, Y. Teng, L. Zhao and K. Swierczek, *Electrochim. Acta*, 2017, **225**, 129-136.
- S8. Y. S. Jang and Y. C. Kang, *Phys. Chem. Chem. Phys.*, 2013, **15**, 16437-16441.
- S9. X. Du, H. Zhao, Y. Lu, Z. Zhang, A. Kulka and K. Swierczek, *Electrochim. Acta*, 2017, **228**, 100-106.
- S10. J. Li, Y. Fu, X. Shi, Z. Xu and Z. Zhang, *Chem. Eur. J.*, 2017, **23**, 157-166.
- S11. H. Li, Y. Su, W. Sun and Y. Wang, *Adv. Funct. Mater.*, 2016, **26**, 8345-8353.
- S12. J. Yang, Y. Zhang, C. Sun, G. Guo, W. Sun, W. Huang, Q. Yan and X. Dong, *J. Mater. Chem. A*, 2015, **3**, 11462-11470.
